# Supplementary material for: Examining the Genetic and Environmental Associations between Autistic Social and Communication Deficits and Psychopathic Callous-Unemotional Traits
Source: PubMed Central journal article supplement (PMC4556482; doi:10.1371/journal.pone.0134331), 2015-09-01
Supplement: pone.0134331.s002.pdf [file pone.0134331.s002.pdf]

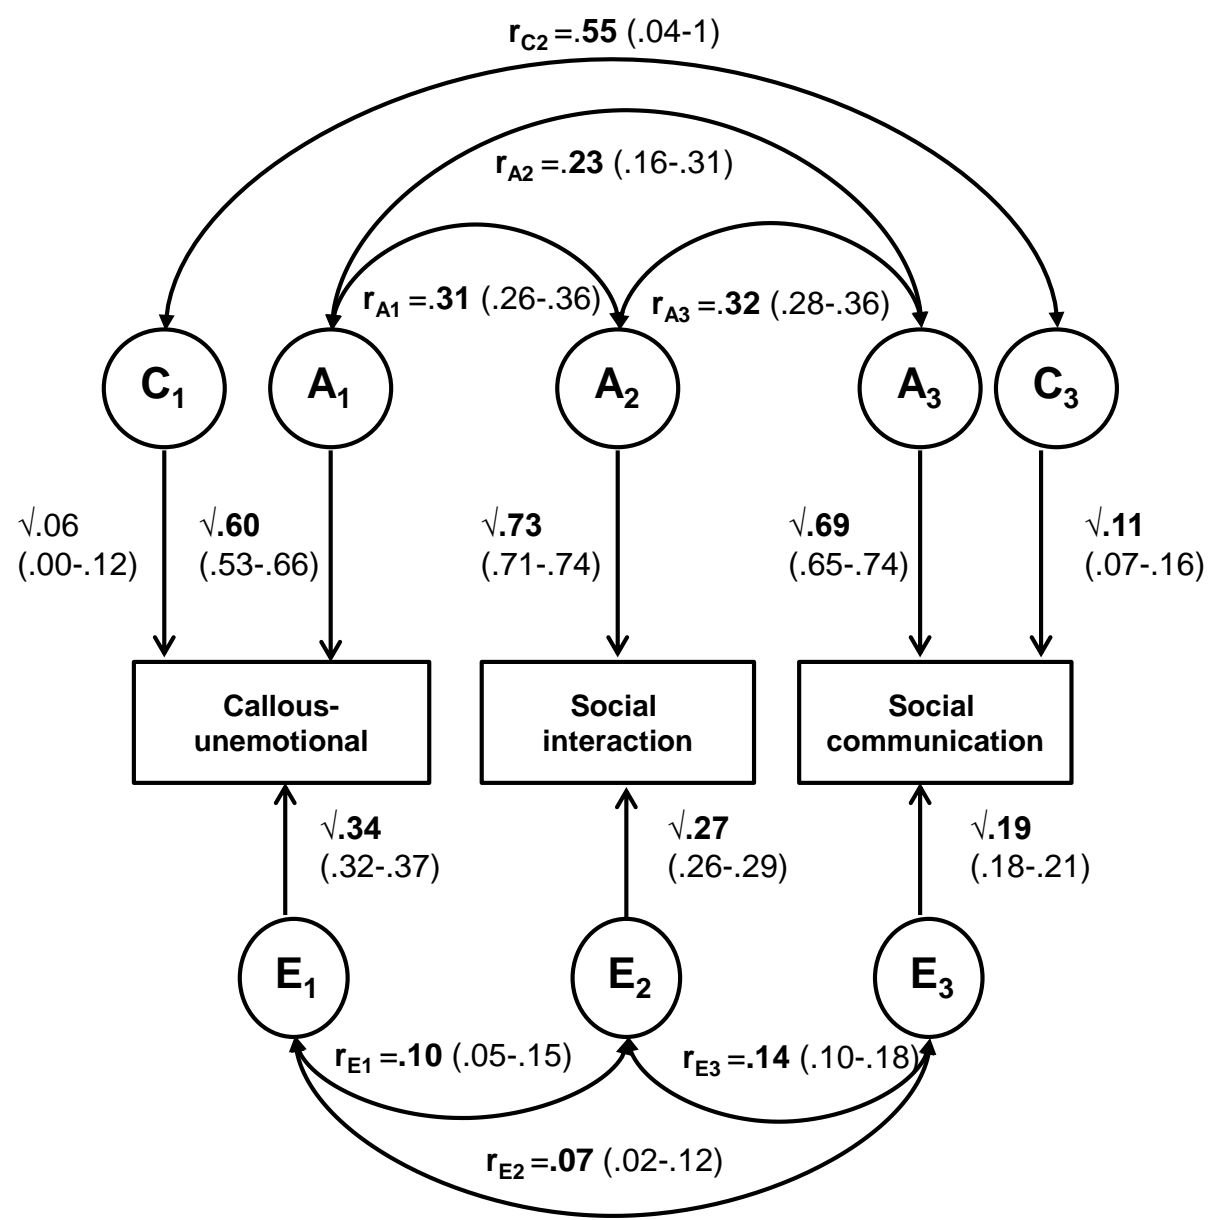

**Supplemental Figure 1:** Cholesky ACE model: Correlated Factors Solution outputs using parent-report data on callous-unemotional traits, social interaction and social communication. Abbreviations: A<sub>1-3</sub> = Additive genetic factors modelled for each trait separately; C<sub>1 & 3</sub> = Shared environmental factors modelled for each trait separately; E<sub>1-3</sub> = Non-shared environmental factors modelled for each trait separately. Correlations for A, C and E factors between pairs of traits are shown. Paths from the A, C and E factors onto the traits reflect the estimated role of each of these factors in contributing to variance on the trait. Path C<sub>2</sub> was removed as common environmental factors did not contribute significantly to variance on social interaction difficulties
