# Supplementary material for: Examining the Genetic and Environmental Associations between Autistic Social and Communication Deficits and Psychopathic Callous-Unemotional Traits
Source: PubMed Central journal article supplement (PMC4556482; doi:10.1371/journal.pone.0134331), 2015-09-01
Supplement: pone.0134331.s003.pdf [file pone.0134331.s003.pdf]

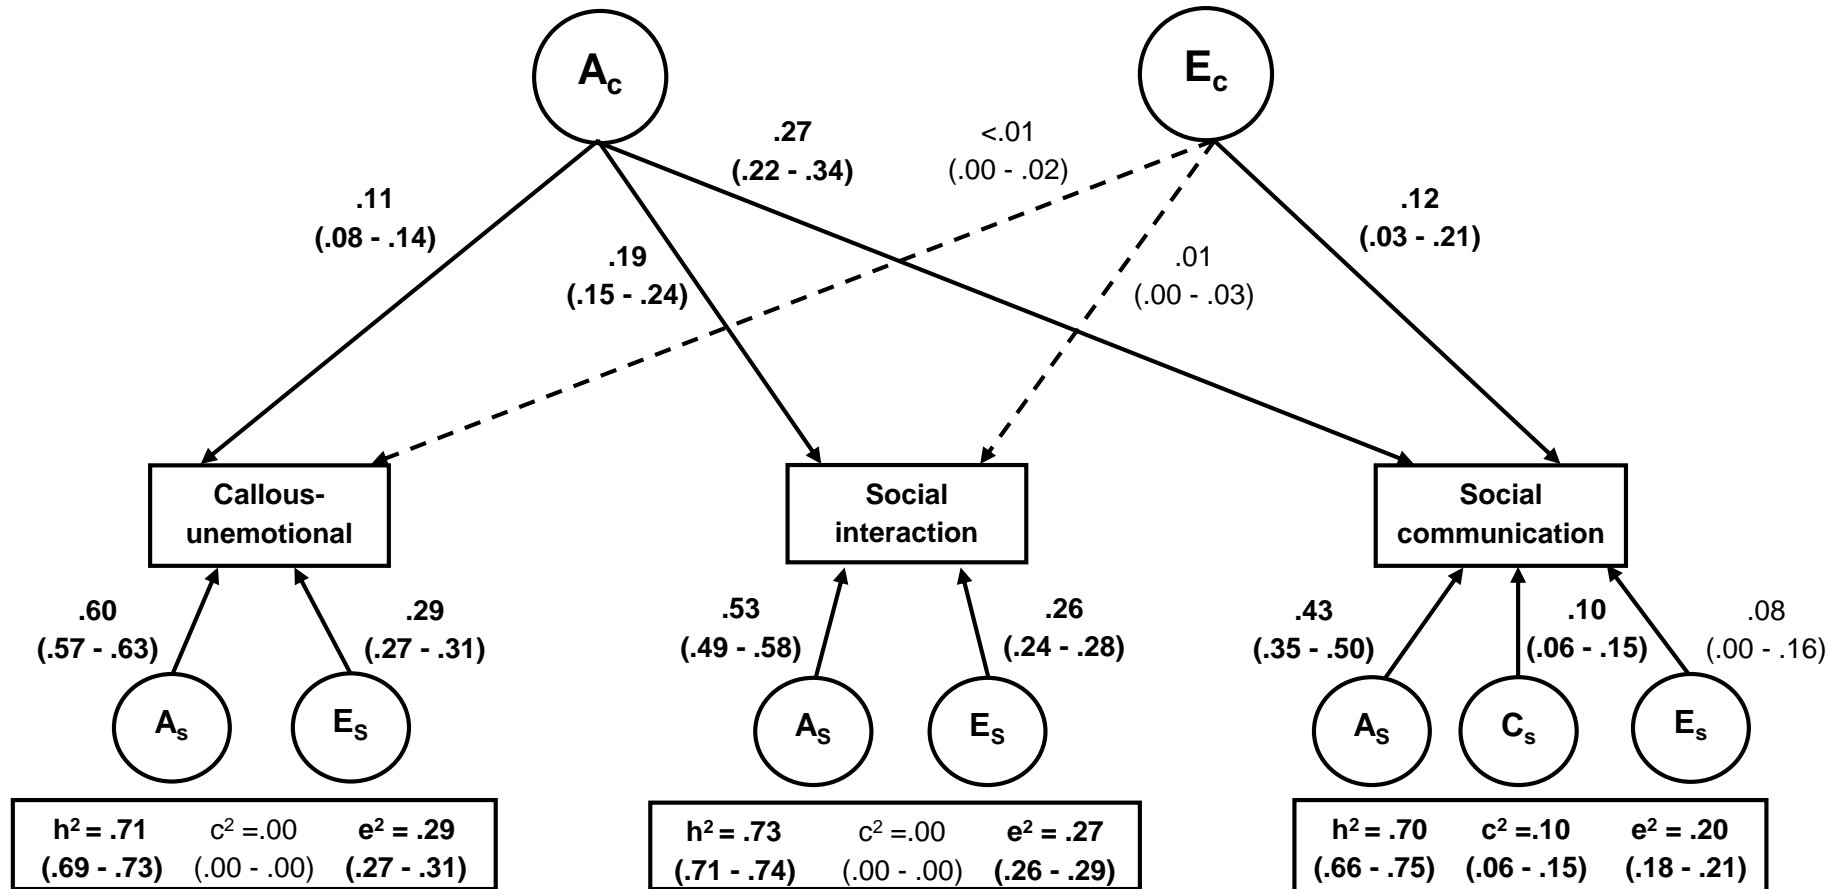

**Supplemental Figure 2:** Path diagram of the reduced Independent Pathway model. Paths estimates are expressed as the proportion of variance accounted for by common or specific etiological factors. For callous-unemotional, 15% of overall genetic influences are due to shared factors and 85% due to trait specific factors. For social interaction, 26% of overall genetic influences are due to shared factors and 74% due to trait specific factors. For social communication, 39% of overall genetic influences are due to shared factors and 61% due to trait specific factors. Dotted arrows indicate a non-significant path estimate.  $A_c$  = common genetic factors;  $E_c$  = common non shared environmental factors;  $A_s$  = specific genetic factors;  $C_s$  = specific shared environmental factors;  $E_s$  = specific non shared environmental factors.  $h^2$  = proportion of variance on the trait explained by additive genetic influences;  $c^2$  = proportion of variance explained by shared environmental influences;  $e^2$  = proportion of variance explained by non-shared environmental influences.
